# Supplementary material
Source: PubMed Central journal article supplement (PMC9492806)
Supplement: NIHMS1804083-supplement-Supporting_Information.pdf [file NIHMS1804083-supplement-Supporting_Information.pdf]

## Supporting Information

### **Site-Specific Chemoenzymatic Conjugation of High-Affinity M6P Glycan Ligands to Antibodies for Targeted Protein Degradation**

Xiao Zhang,<sup>a</sup> Huiying Liu,<sup>a</sup> Jia He,<sup>b</sup> Chong Ou,<sup>a</sup> Thomas C. Donahue,<sup>a</sup> Musleh M. Muthana,<sup>b</sup> Lishan Su,<sup>b</sup>  
Lai-Xi Wang <sup>\*a</sup>

<sup>a</sup>. Department of Chemistry and Biochemistry, University of Maryland, College Park, Maryland 20742, United States.

<sup>b</sup>. Division of Virology, Pathogenesis, and Cancer, Institute of Human Virology, Departments of Pharmacology, Microbiology, and Immunology, University of Maryland School of Medicine, Baltimore, Maryland 21201, United States.

\*Corresponding Author. Email: [wang518@umd.edu](mailto:wang518@umd.edu)

## Contents

|                                                                                                                                |     |
|--------------------------------------------------------------------------------------------------------------------------------|-----|
| 1. Fig. S1: LC-MS analysis of the trastuzumab M6P glycoform (3).....                                                           | S3  |
| 2. Fig. S2: LC-MS analysis of the trastuzumab M6P glycoform (6).....                                                           | S4  |
| 3. Fig. S3: LC-MS analysis of the trastuzumab M6P glycoform (7).....                                                           | S5  |
| 4. Fig. S4: LC-MS analysis of the cetuximab M6P glycoform (9).....                                                             | S6  |
| 5. Fig. S5: LC-MS analysis of the cetuximab M6P glycoform (10).....                                                            | S7  |
| 6. Fig. S6: Analysis of the Fab and Fc glycans of the cetuximab M6P glycoforms (9 and 10). ....                                | S8  |
| 7. Fig. S7: Western blot analysis of HER2 and EGFR degradation after treatment with native or M6P-<br>modified antibodies..... | S9  |
| 8. Fig. S8. Degradation of surface HER2 or EGFR as probed by flow cytometry.....                                               | S10 |
| 9. Fig. S9. Inhibition of the clone AY13 EGFR detection of GFR by cetuximab.....                                               | S11 |
| 8. Materials and general methods.....                                                                                          | S12 |
| 9. Screening of transglycosylation conditions.....                                                                             | S12 |
| 10. Preparation of deglycosylated antibodies.....                                                                              | S13 |
| 11. Release and enrichment of N-glycans from Fab and Fc fragments.....                                                         | S14 |
| 12. References .....                                                                                                           | S15 |

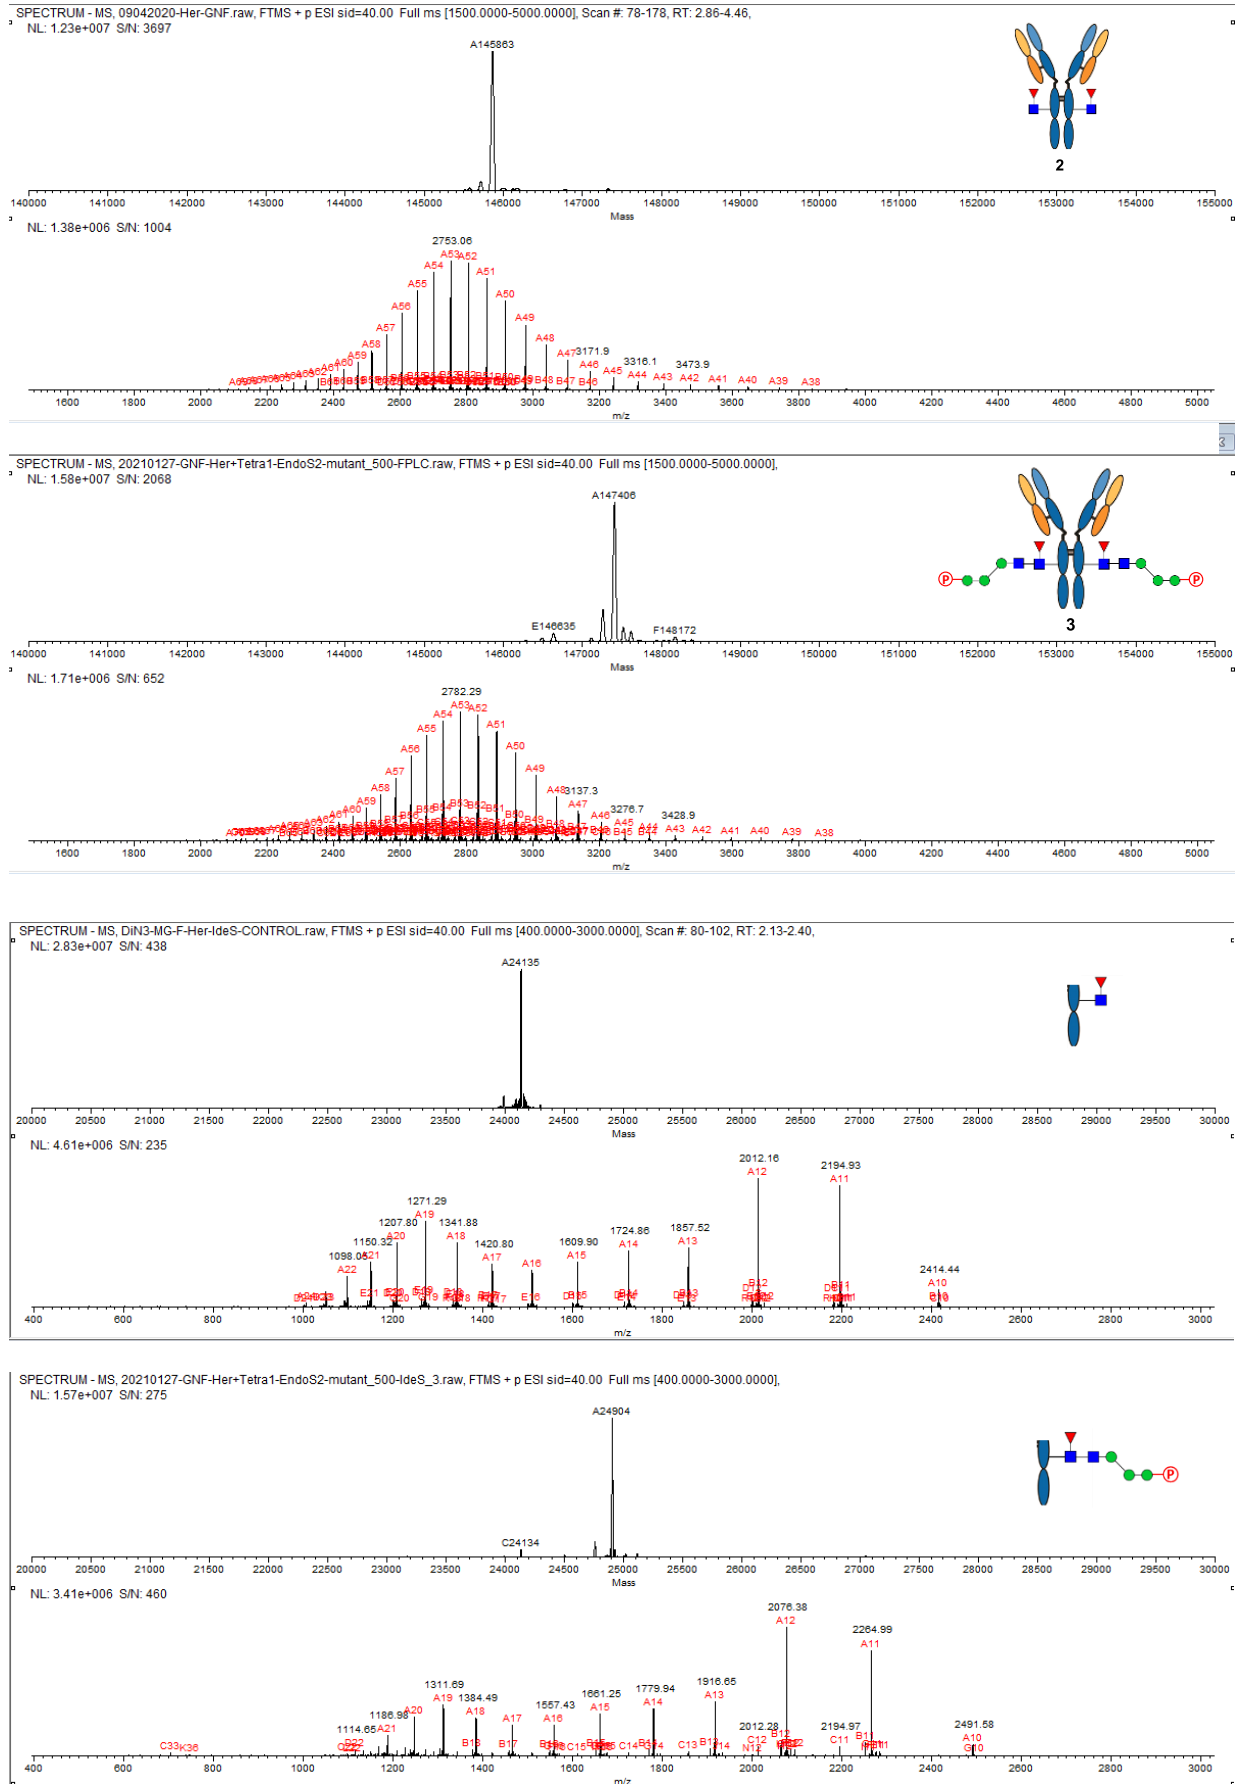

**Fig. S1.** LC-MS analysis of compound 3.

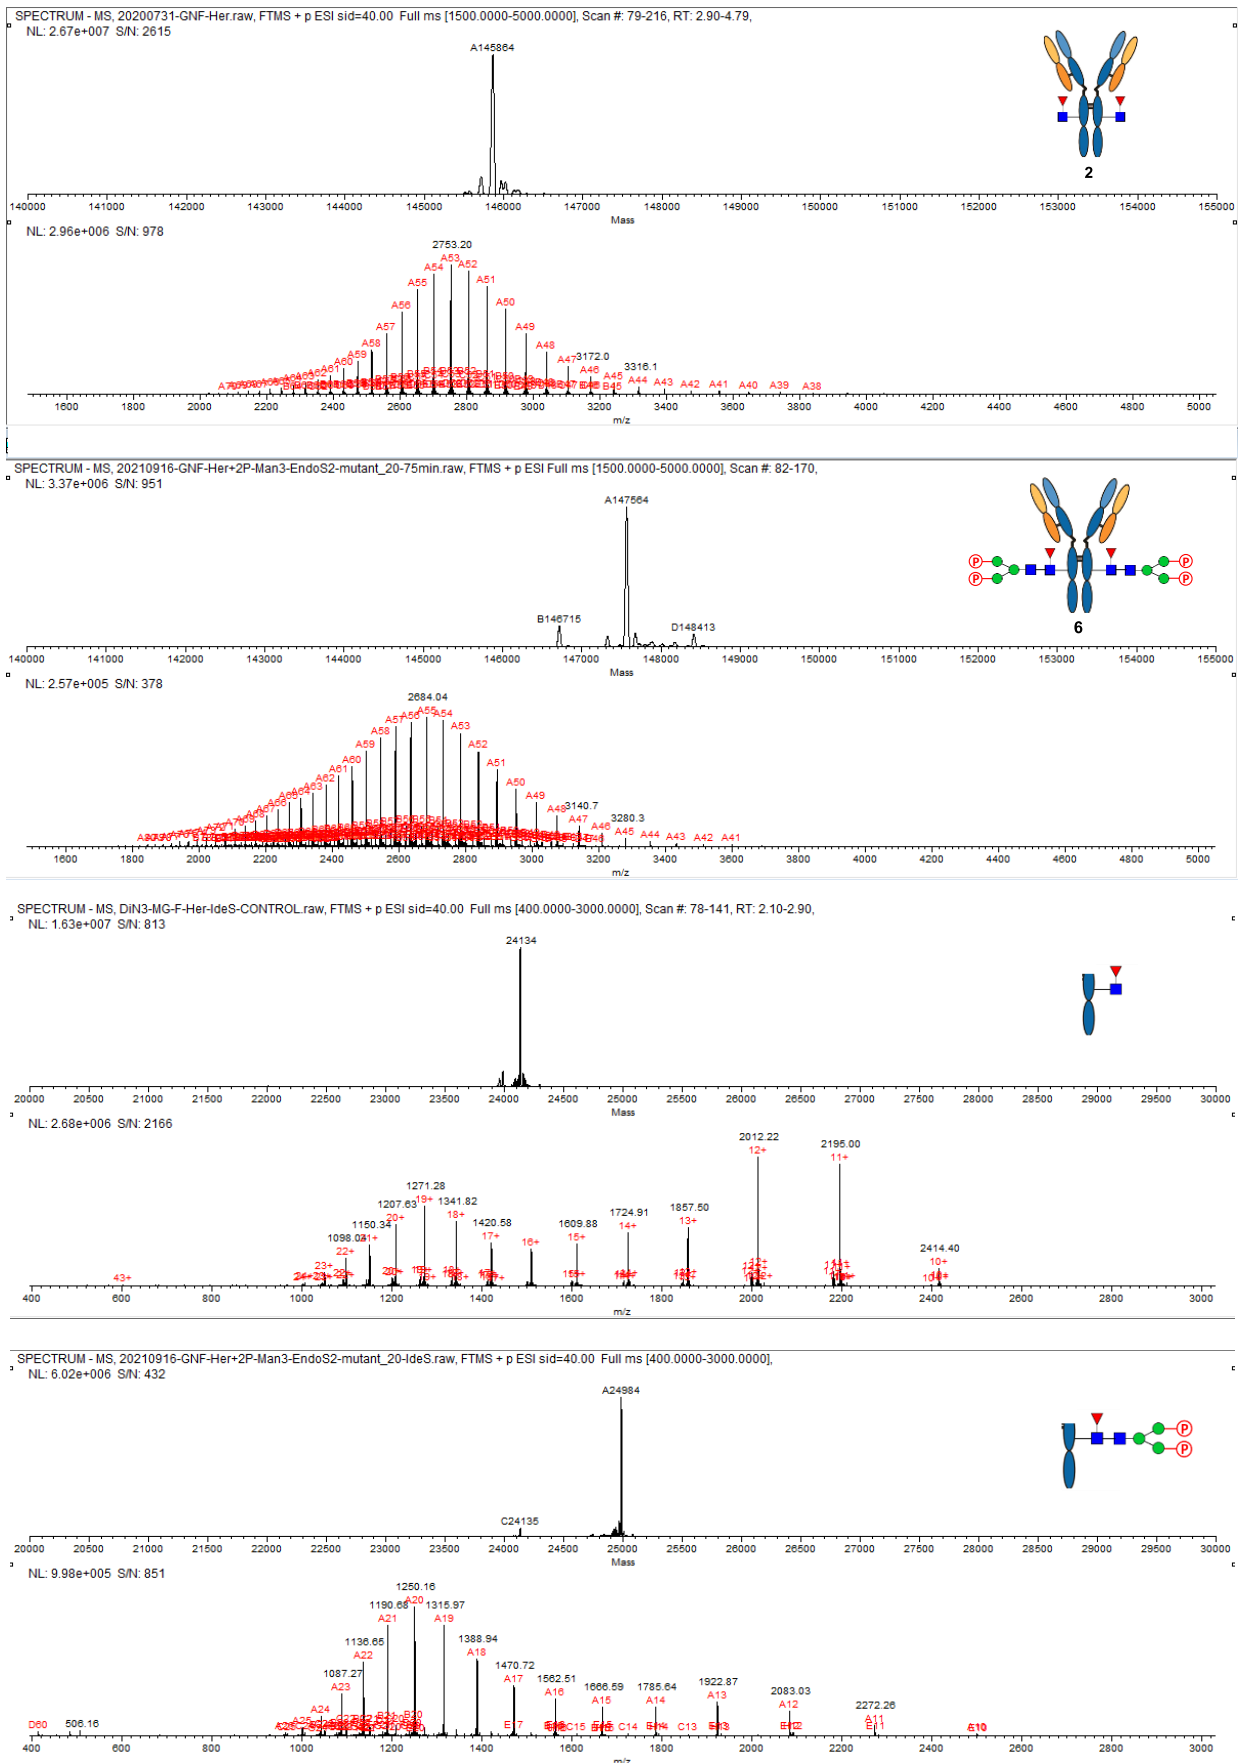

Fig. S2. LC-MS analysis of compound 6.

SPECTRUM - MS, 20200731-GNF-Her.raw, FTMS + p ESI sid=40.00 Full ms [1500.0000-5000.0000], Scan # 79-216, RT: 2.90-4.79, NL: 2.67e+007 S/N: 2615

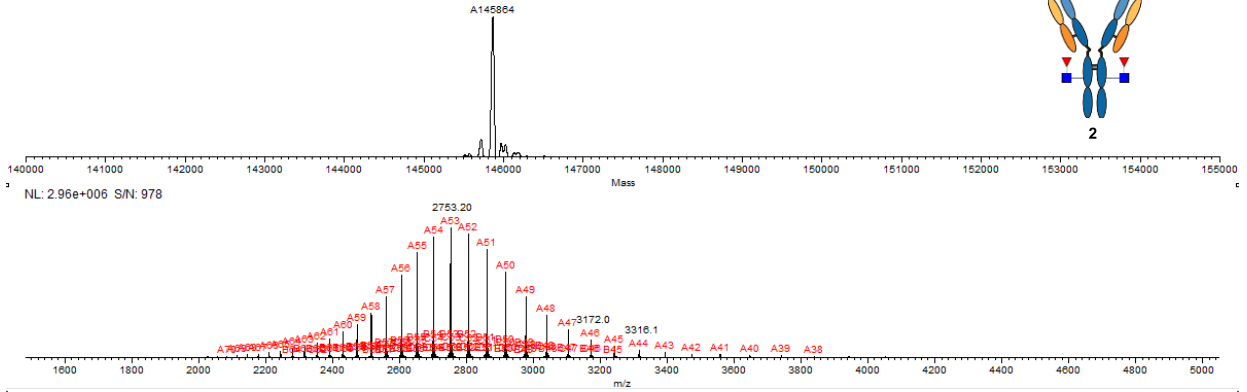

SPECTRUM - MS, 20210915-GNF-Her+2P-Hepta-EndoS2-mutant\_20-90min.raw, FTMS + p ESI Full ms [1500.0000-5000.0000], Scan # 79-189, NL: 3.96e+006 S/N: 832

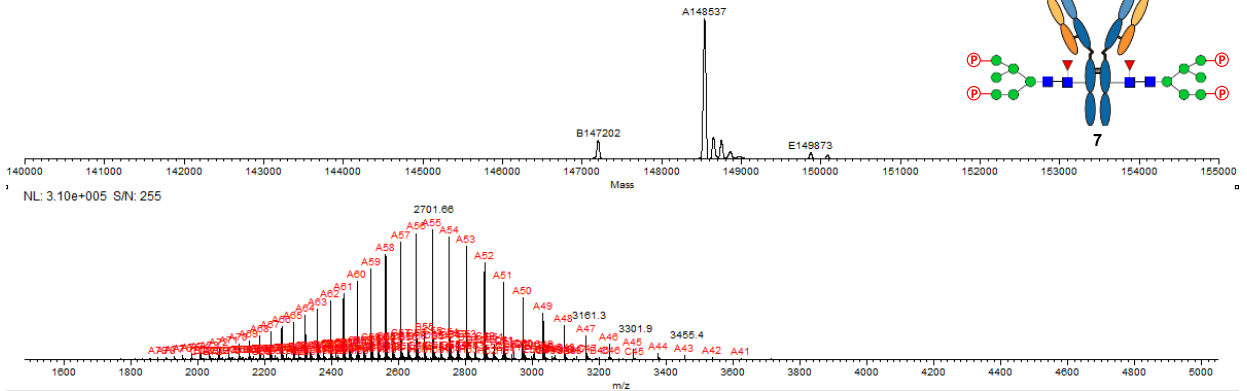

SPECTRUM - MS, DiN3-MG-F-Her-IdeS-CONTROL.raw, FTMS + p ESI sid=40.00 Full ms [400.0000-3000.0000], Scan # 78-141, RT: 2.10-2.90, NL: 1.63e+007 S/N: 813

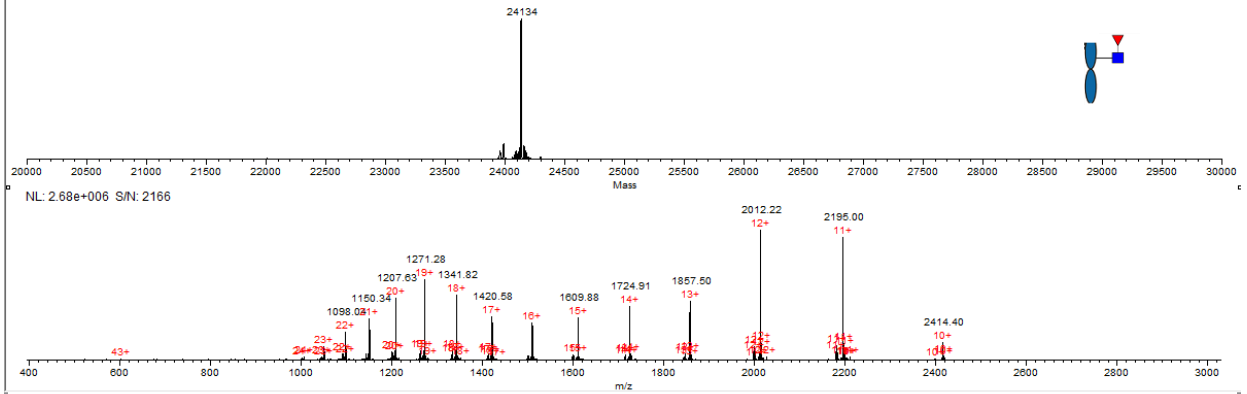

SPECTRUM - MS, 20210915-GNF-Her+2P-Hepta-EndoS2-mutant\_20-IdeS.raw, FTMS + p ESI sid=40.00 Full ms [400.0000-3000.0000], NL: 9.24e+006 S/N: 401

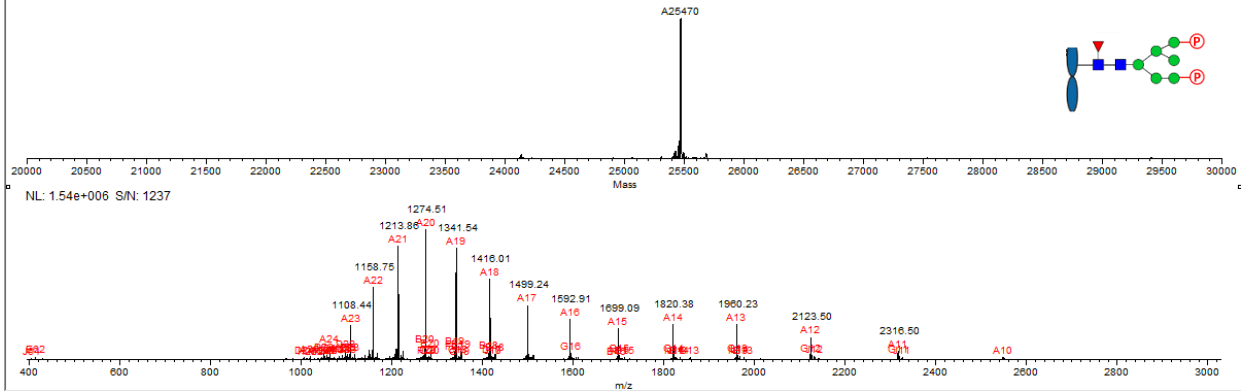

Fig. S3. LC-MS analysis of compound 7.

SPECTRUM - MS, 20210127-GNF-Ctx.raw, FTMS + p ESI sid=40.00 Full ms [1500.0000-5000.0000], Scan #. 80-137, RT: 2.93-5.02, NL: 1.68e+005 S/N: 187

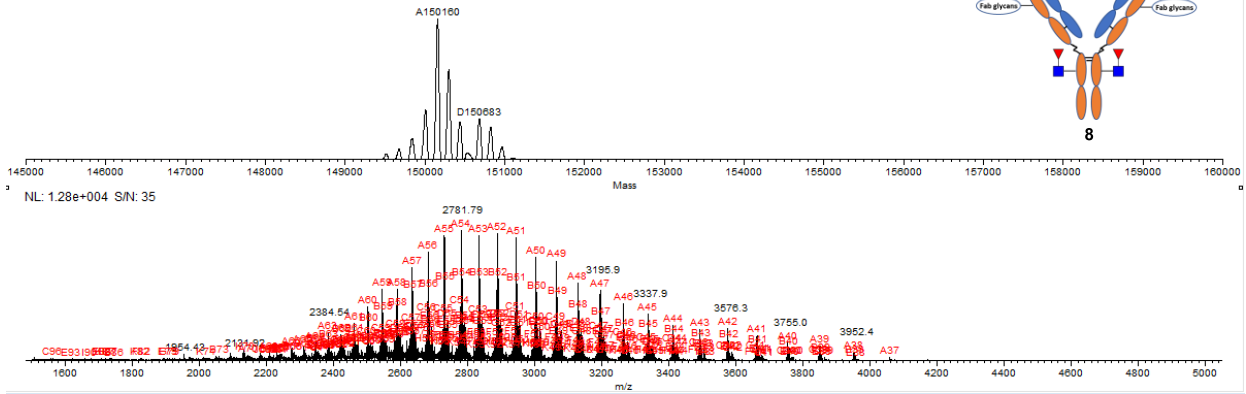

SPECTRUM - MS, 09272020\_GNF-Ctx+M6P-Tetra1-15min.raw, FTMS + p ESI sid=40.00 Full ms [1500.0000-5000.0000], Scan #. 79-142, NL: 2.05e+005 S/N: 175

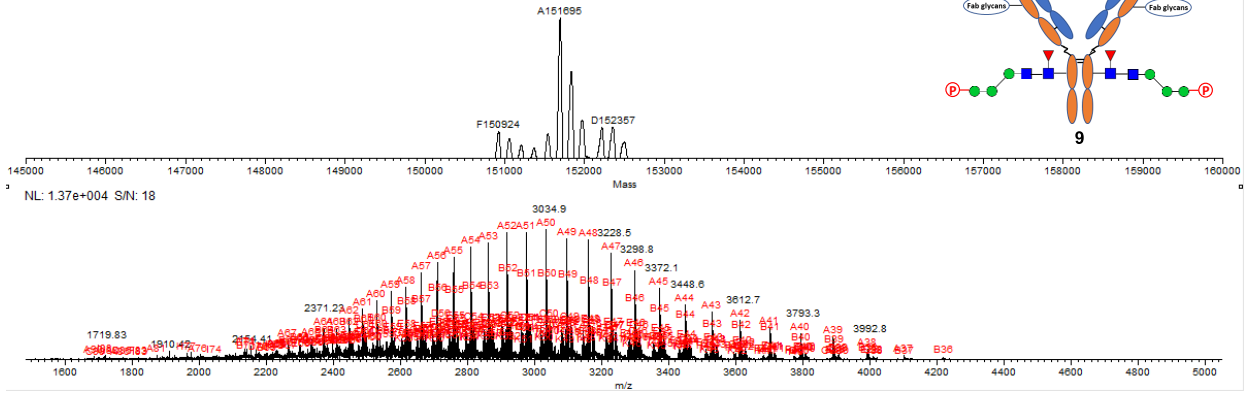

SPECTRUM - MS, 09262020\_GNF-Cetuximab-FPLC-IdeS.raw, FTMS + p ESI sid=40.00 Full ms [400.0000-3000.0000], Scan #. 76-103, NL: 1.47e+007 S/N: 374

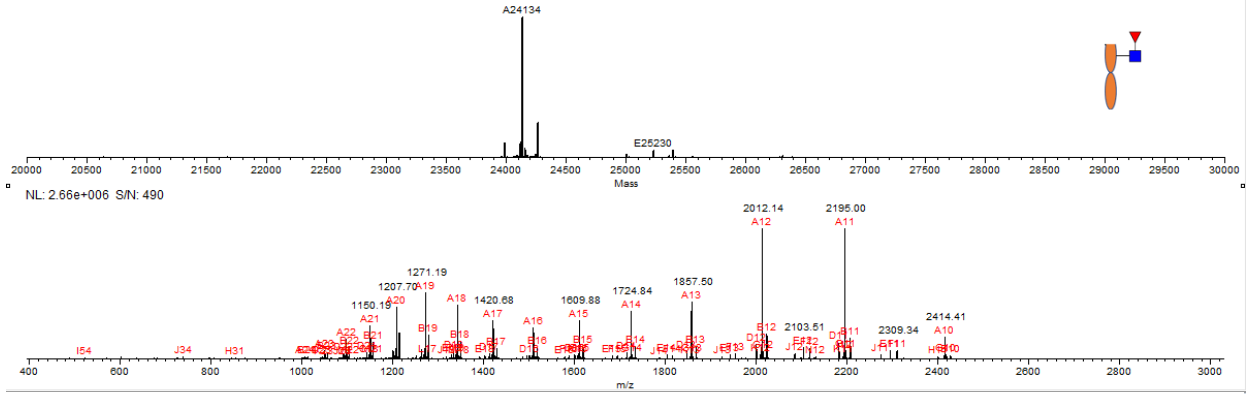

SPECTRUM - MS, 20210127-GNF-Ctx+Tetra1-EndoS2-mutant\_500-IdeS.raw, FTMS + p ESI sid=40.00 Full ms [400.0000-3000.0000], NL: 2.18e+007 S/N: 113

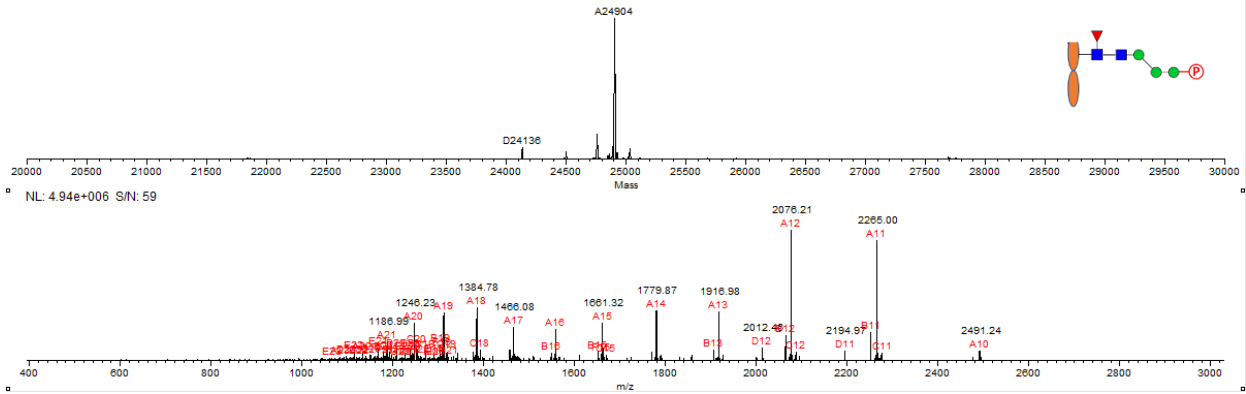

**Fig. S4.** LC-MS analysis of compound 9.

SPECTRUM - MS, 20210127-GNF-Ctx.raw, FTMS + p ESI sid=40.00 Full ms [1500.0000-5000.0000], Scan #: 81-138, RT: 2.97-5.06, NL: 1.68e+005 S/N: 189

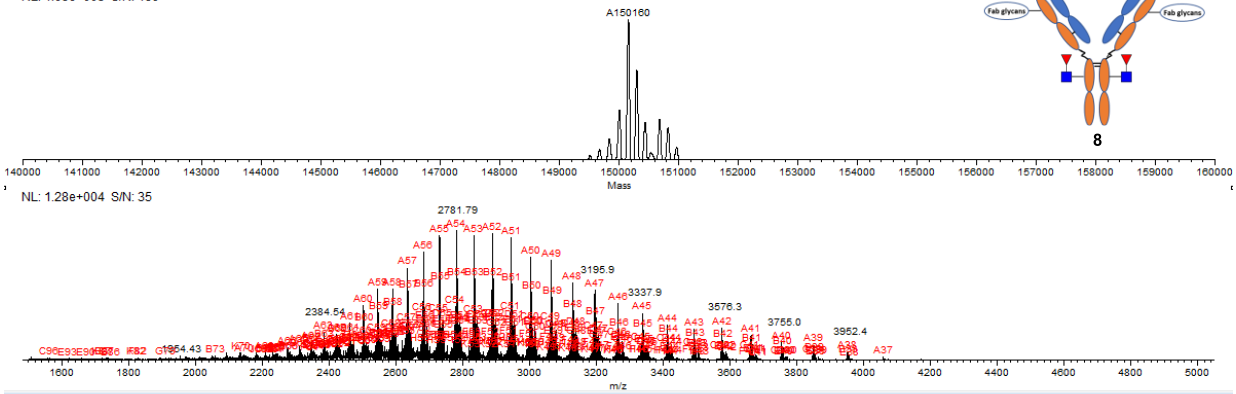

SPECTRUM - MS, 20210919-GNF-Ctx+2P-Hepta-EndoS2-mutant\_10-FPLC-2.raw, FTMS + p ESI sid=40.00 Full ms [1500.0000-5000.0000], NL: 5.91e+005 S/N: 78

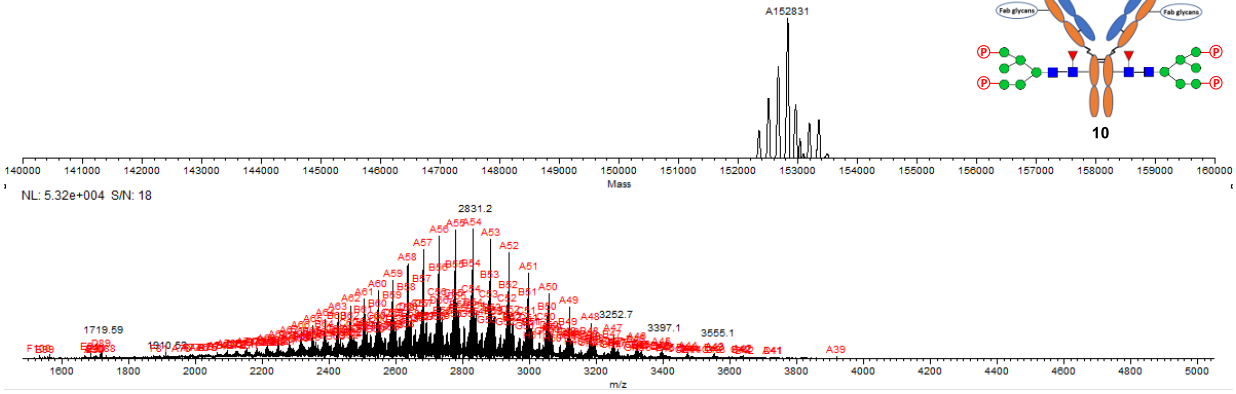

SPECTRUM - MS, 20201024-GNF-Cet-IdeS.raw, FTMS + p ESI sid=40.00 Full ms [400.0000-3000.0000], Scan #: 29-45, RT: 1.09-1.31, NL: 2.64e+006 S/N: 442

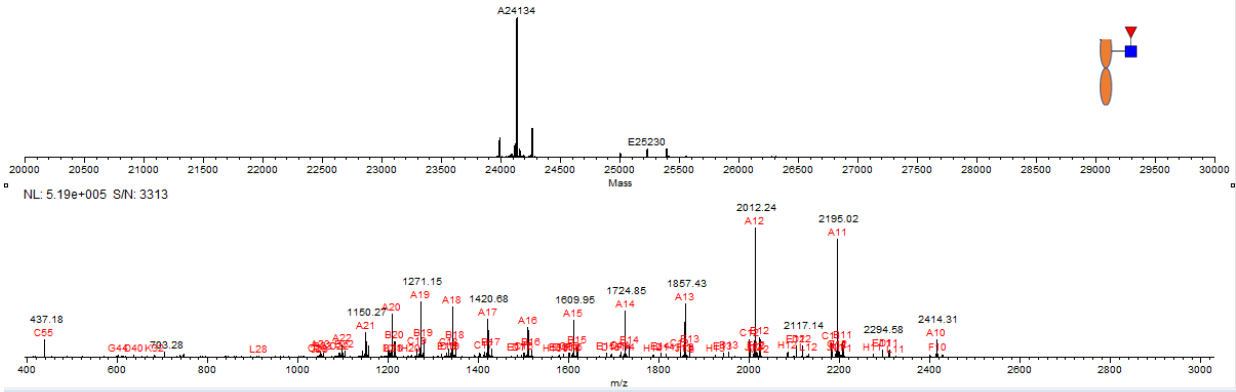

SPECTRUM - MS, 20210919-GNF-Ctx+2P-Hepta-EndoS2-mutant\_10-FPLC-IdeS.raw, FTMS + p ESI sid=40.00 Full ms [400.0000-3000.0000], NL: 8.41e+006 S/N: 179

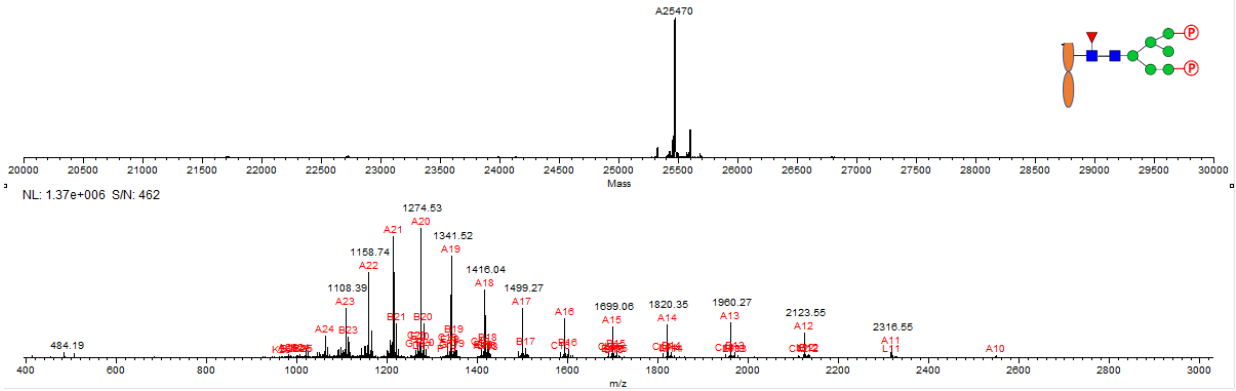

**Fig. S5. LC-MS analysis of compound 10.**

Trastuzumab (Fc glycans):

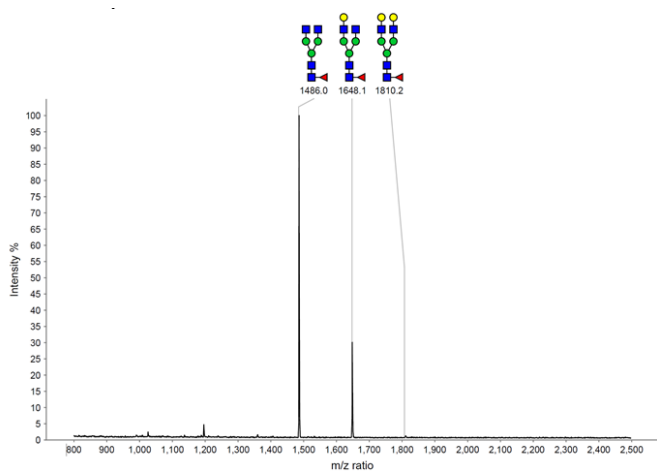

Compound 3 (Fc glycans):

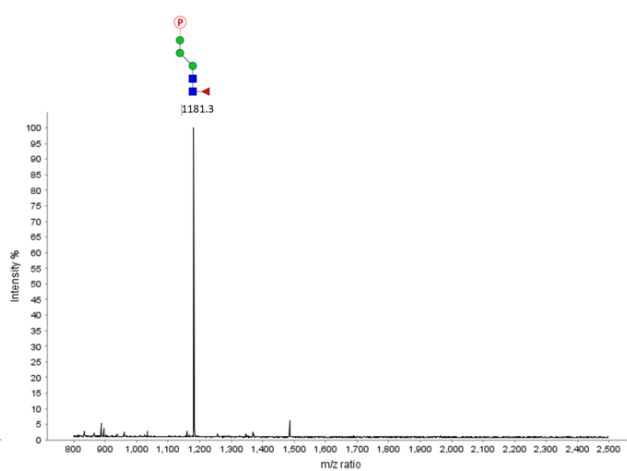

Cetuximab (Fab glycans):

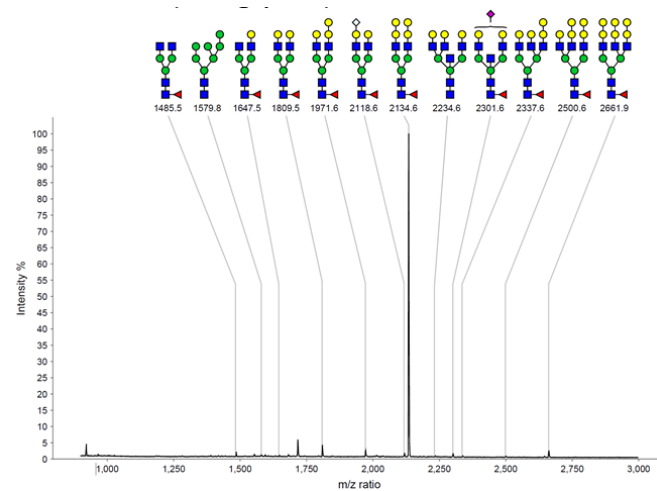

Compound 9 (Fab glycans):

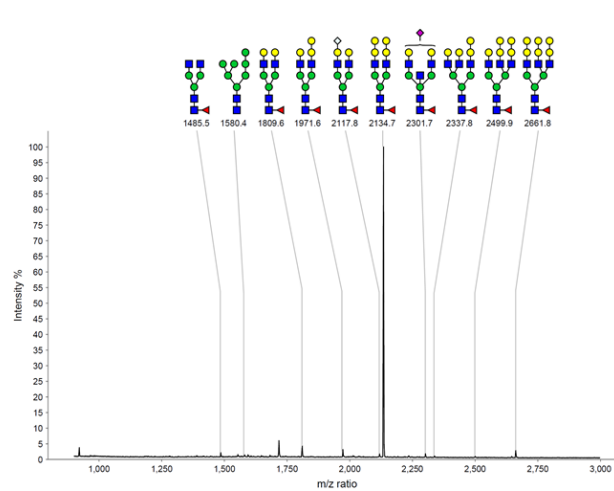

Cetuximab (Fc glycans):

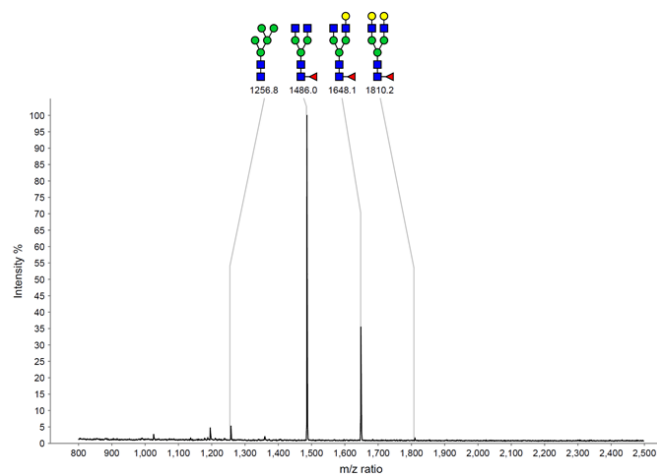

Compound 9 (Fc glycans):

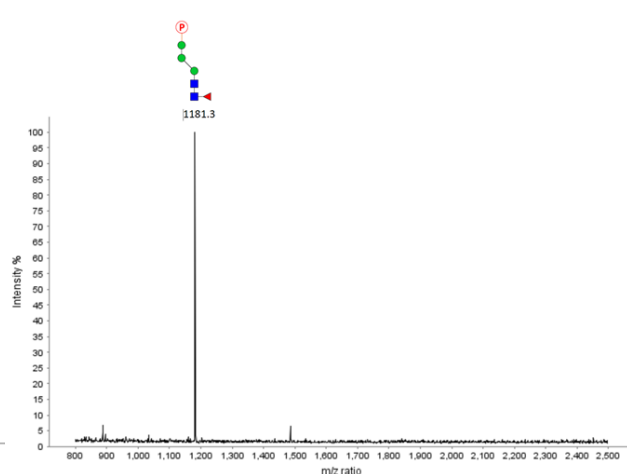

**Fig. S6.** MALDI-TOF-MS spectra (positive-ion mode) of free N-glycans from commercial antibodies and the glycoengineered antibodies (**3** and **9**) released by PNGase F treatment.



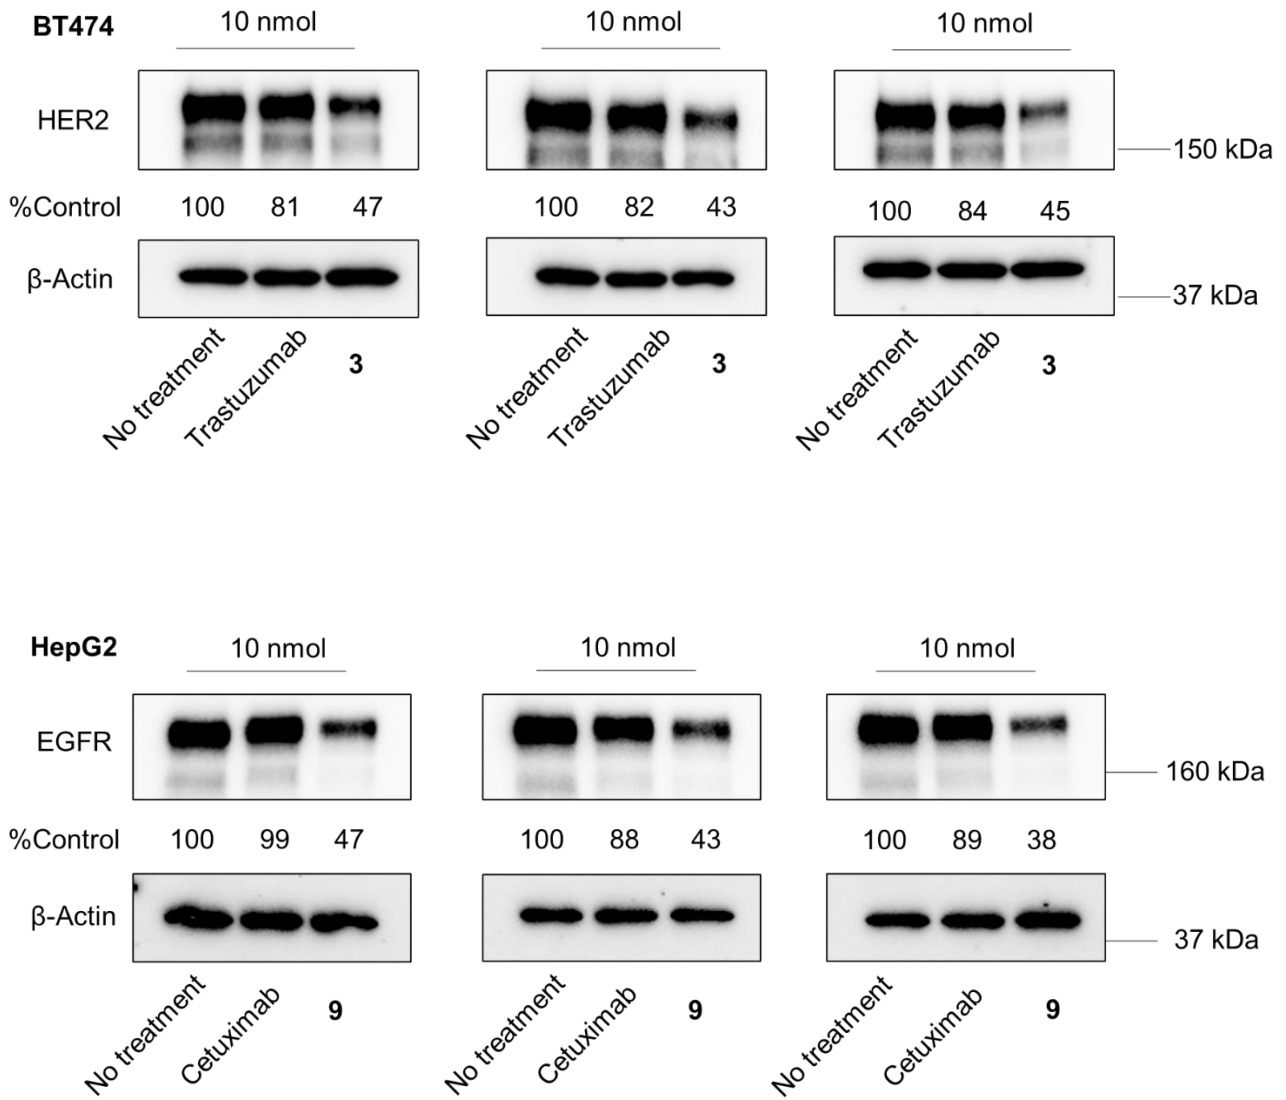

**Fig. S7.** Western blot analysis of HER2 and EGFR degradation after treatment with native or M6P-modified antibodies.

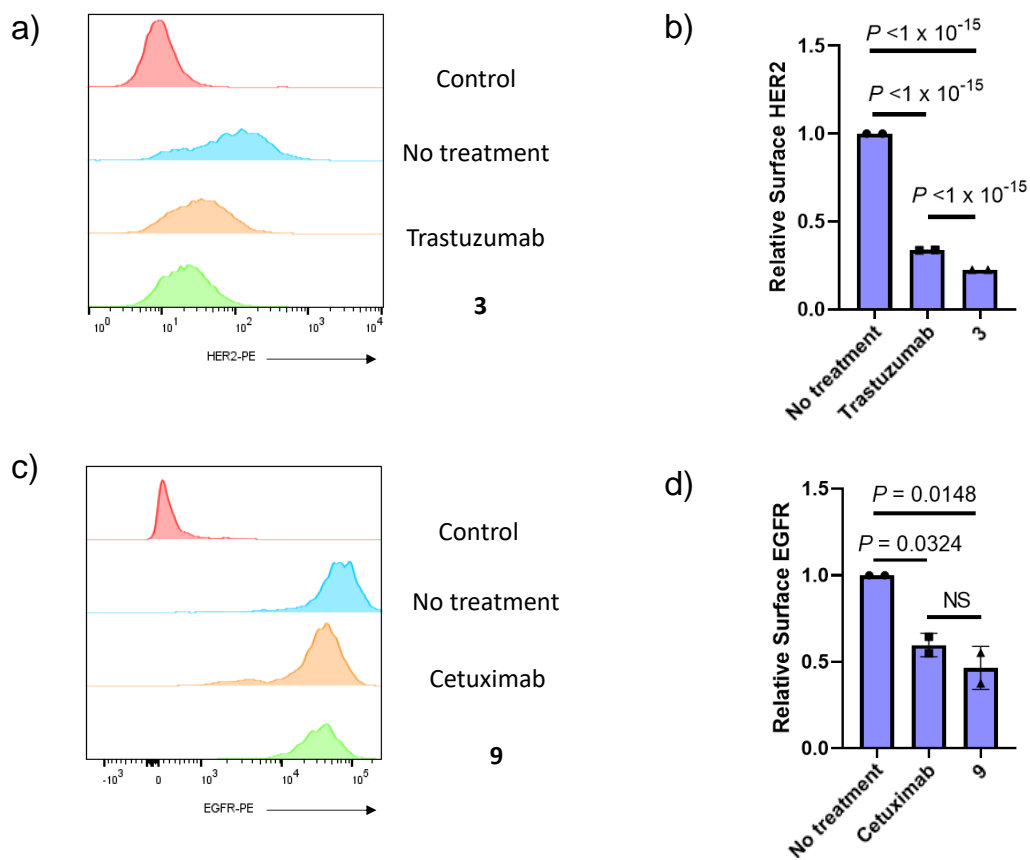

**Figure S8.** Degradation of cell surface HER2 or EGFR as determined by live-cell flow cytometry following 48 h of treatment with 10 nM native or M6P-modified antibodies. a) Representative FACS analysis of surface HER2 levels; b) Surface HER2 levels after treatment with trastuzumab or **3**; c) Representative FACS analysis of surface EGFR levels; d) Surface EGFR levels after treatment with cetuximab or **9**. All assays were performed in triplicate. Cells were stained with PE conjugated anti-human CD340 (erbB2/HER2) antibody (BioLegend, Cat.# 324405), PE conjugated anti-human EGFR (BioLegend, Cat.# 352903), or PE conjugated Isotype control antibody in PBS at 4°C for 30 min. *P* values were determined by one-way ANOVA multiple comparison tests. NS, not significant; *P* value of >0.05 was considered not significant.

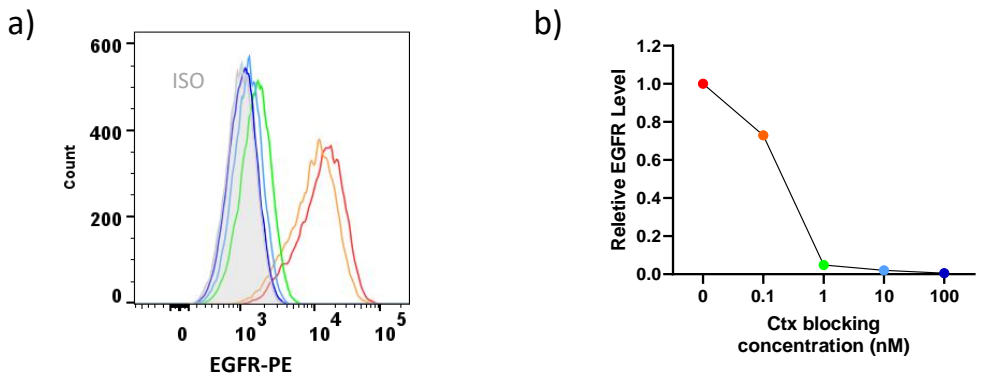

**Figure S9.** Inhibition of the clone AY13 EGFR detection of GFR by cetuximab. a) a representative FACS analysis of surface EGFR levels; b) Inhibition of surface EGFR detection by cetuximab. In a 96-well setting, freshly trypsinized and FACS buffer washed HepG2 cells were pre-incubated with a 10-fold serial dilution of cetuximab starting from 100 nM on ice for 25 min. Cells were then washed and incubated with anti-EGFR PE (clone AY13) for 25 mins and washed. Cells were then incubated for 10 min with aqua live/dead stain and washed and re-suspended in FACS buffer for flow acquisition.

## Materials and Methods.

All chemicals, reagents, and solvents were purchased from Sigma–Aldrich and Thermo Fisher Scientific and unless specially noted applied in the reaction without further purification. MALDI-TOF MS analysis was performed on a Bruker Autoflex Speed Mass Spectrometer in positive reflectron mode with DHB (ACN/H<sub>2</sub>O = 1:1) as the matrix. LC-ESI-MS analysis was performed on an Ultimate 3000 HPLC system coupled to an Exactive Plus Orbitrap mass spectrometer (Thermo Fischer Scientific) with C4 (whole antibody, gradient, 5–95% aq MeCN containing 0.1% FA for 6 min, 0.4 mL/min) or C8 (IdeS digestion, gradient, 25–35% aq MeCN containing 0.1% FA for 6 min, 0.4 mL/min) column. Deconvolution data was transformed by MagTran software.

### 1. Screening of the transglycosylation conditions.

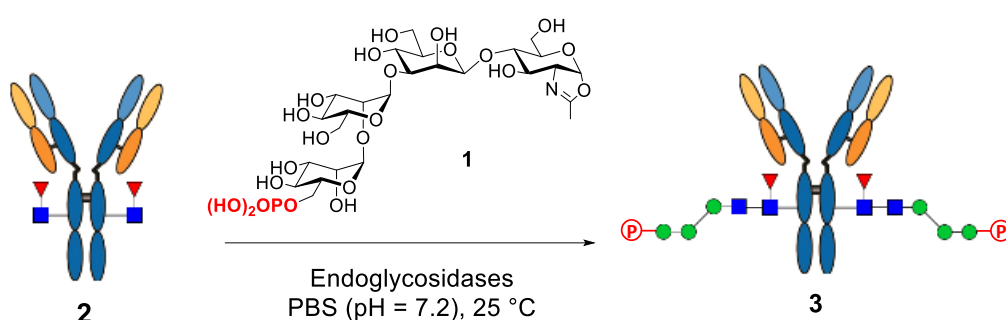

A solution of the deglycosylate trastuzumab (**2**) (100 µg) and the M6P tetrasaccharide oxazoline (**1**) (21.1 µg, 20 eq per Fc glycosylation site) was incubated with different endoglycosidases (0.1 µg ~ 10 µg) at 25 °C in 10 µL of 150 mM PBS buffer (pH 7.2). The reaction was monitored by LC-ESI-MS analysis of aliquots. The ratio of the starting material and the product species were determined by the peak intensities.

| Enzymes       | Sources                           |
|---------------|-----------------------------------|
| Endo-S        | <i>Streptococcus pyogenes</i>     |
| Endo-S D233Q  | <i>Streptococcus pyogenes</i>     |
| Endo-S2       | <i>Streptococcus pyogenes M49</i> |
| Endo-S2 D184M | <i>Streptococcus pyogenes M49</i> |
| Endo-F3       | <i>Elizabethkingia miricola</i>   |
| Endo-F3 DA65A | <i>Elizabethkingia miricola</i>   |
| Endo-A        | <i>Arthrobacter protophormiae</i> |
| Endo-CC       | <i>Coprinopsis cinerea</i>        |
| Endo-D        | <i>Streptococcus pneumoniae</i>   |

## 2. Preparation of the deglycosylated trastuzumab (**2**).

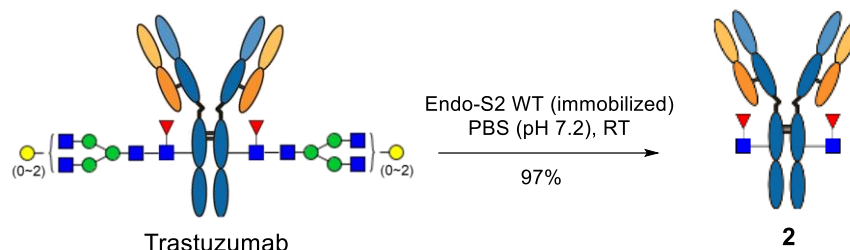

Trastuzumab was deglycosylated as previously described.<sup>[1]</sup> Briefly, the commercial trastuzumab (10 mg) was applied to a spin column (Pierce #69705) containing the immobilized wild-type Endo-S2 (Endo-S2 WT) (200  $\mu$ g) in a total volume of 1.0 ml (PBS, pH = 7.2). The mixture was incubated for 1h at room temperature when LC-ESI-MS indicated the completion of deglycosylation. Then the reaction mixture was passed through the spin filter and separated from the agarose resins by centrifugation to afford the deglycosylated trastuzumab (**2**) (9.5 mg, 97%). ESI-MS: calculated for whole antibody,  $M = 145865$  Da; found ( $m/z$ ), 145863 (deconvolution data); calculated for the Fc monomer after IdeS digestion,  $M = 24134$  Da; found ( $m/z$ ), 24135 (deconvolution data).

## 3. Preparation of Fc deglycosylated trastuzumab (**8**).

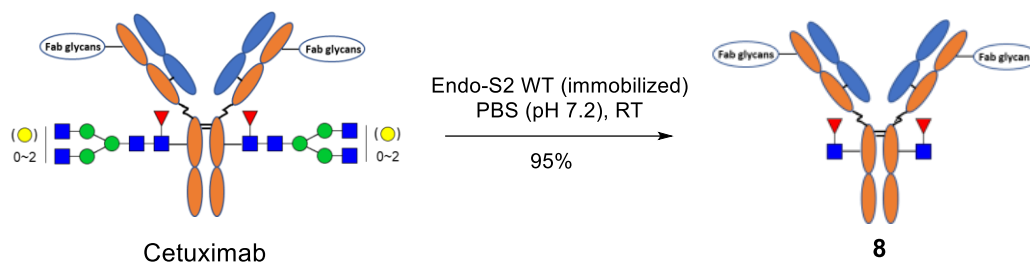

The commercial Cetuximab (10 mg) was applied to a spin column (Pierce #69705) containing the immobilized Endo-S2 WT (400  $\mu$ g) in a total volume of 5.0 ml (PBS, pH = 7.2). The mixture was incubated for 2 h at room temperature when LC-ESI-MS of the Fc domain after IdeS treatment indicated the completion of deglycosylation. The reaction mixture was passed through the spin filter and separated from the agarose resins by centrifugation to afford the Fc-deglycosylated cetuximab (**8**) (9.3 mg, 95%). ESI-MS: calculated for the Fc monomer after IdeS treatment,  $M = 24134$  Da; found ( $m/z$ ), 24134 (deconvolution data).

#### 4. Release and enrichment of the N-glycans from the Fab and Fc domains.

The release of N-glycans from antibodies was performed following the NEB PNGase F Protocol <sup>[2]</sup> with modifications. For the analysis of trastuzumab and M6P-modified trastuzumab (**3**), the antibody (200 µg) and PNGase F (10 µg) were mixed in 20 µL of the PBS buffer (150 mM, pH = 7.2). the mixture was incubated at 37 °C for 5 h. LC-ESI-MS analysis indicated the completion of glycan release. The released N-glycans were purified on a porous graphitic carbon cartridge (The Hypersep Hypercarb PGC from the Thermo Scientific). The fractions containing the N-glycans were pooled, lyophilized, and analyzed by MALDI-TOF MS.

For the analysis of Cetuximab and M6P-modified cetuximab (**9**), the antibodies were first treated with protease IdeS to disconnect the Fab and Fc domains. Briefly, the antibody (200 µg) was mixed with IdeS (10 µg) in 20 µL of PBS buffer (150 mM, pH = 7.2). The mixture was incubated at 37 °C for 1 h. Then the reaction mixture was subjected to Protein L (Cytiva, 1 mL). The Fc domain (released as the monomer) was collected in the flow through, and the Fab domain (as an intact dimer) was eluted with citric buffer (30 mM, pH = 2.6). Salts were removed by ultrafiltration and the proteins were extracted and lyophilized to give the separated Fc and Fab domains. The Fc N-glycans were released and analyzed following the procedures as described for the analysis of the trastuzumab Fc glycans. For Fab glycan release, the “Denaturing Reaction Conditions” of the NEB protocol <sup>[2]</sup> were used. Briefly, The Fab domain protein (100 µg) was dissolved in the Glycoprotein Denaturing Buffer (1X, 30 µL), then the mixture was heated at 100 °C for 10 min before adding 6 µL GlycoBuffer 2 (10X), 6 µL 10% NP-40 and 18 µL H<sub>2</sub>O. PNGase F (10 µg) was added, and the reaction was incubated at 37 °C overnight. The released Fab N-glycans were purified and analyzed by MALDI-TOF MS as described above.

## References:

1. T. Li, C. Li, D. N. Quan, W. E. Bentley, L.-X. Wang. *Carbohydr Res*, **2018**, 458-459, 77-84.
2. <https://www.neb.com/protocols/2014/07/31/pngase-f-protocol>
